# Supplementary material for: Exo- or endo-1H-pyrazole metal coordination modulated by the polyamine chain length in [1 + 1] condensation azamacrocycles. Binuclear complexes with remarkable SOD activity
Source: Royal Society of Chemistry journal article supplement (doi:10.1039/d4dt01236d), 2024-01-01
Supplement: d4dt01236d1.pdf [file d4dt01236d1.pdf]

## Supporting Information

### Exo- or Endo- 1*H*-Pyrazole Metal Coordination Modulated by Polyamine Chain length in [1+1] Condensation Azamacrocycles. Binuclear Complexes with Remarkable SOD activity.

Irene Bonastre-Sabater, Alberto Lopera, Álvaro Martínez-Camarena, Salvador Blasco, Antonio Doménech-Carbó, Hermas Jiménez, Begoña Verdejo, Enrique García-España, M. Paz Clares.

## Contents

### I. Figures

**Figure S1.** Distribution diagrams of the protonated species formed by L1 overlapped with the absorbance at 205 nm.

**Figure S2.** Distribution diagrams of the protonated species formed by L2 overlapped with the absorbance at 205 nm.

**Figure S3.** Distribution diagrams of the protonated species formed by L3 overlapped with the absorbance at 205 nm.

**Figure S4.** Distribution diagram for the system Cu<sup>2+</sup>- L2 molar ratio M:L 1:1 and 2:1.

**Figure S5.** Distribution diagram for the system Cu<sup>2+</sup>- L3 molar ratio M:L 1:1 and 2:1.

**Figure S6.** Experimental (top) and calculated (bottom) HR-ESI-Mass Spectra for the [CuL1]<sup>2+</sup> system, in H<sub>2</sub>O/CH<sub>3</sub>OH (50/50 vol/vol).

**Figure S7.** Experimental (top) and calculated (bottom) HR-ESI-Mass Spectra for the [CuL2]<sup>2+</sup> system, in H<sub>2</sub>O/CH<sub>3</sub>OH (50/50 vol/vol).

**Figure S8.** Experimental (top) and calculated (bottom) HR-ESI-Mass Spectra for the [CuL3]<sup>2+</sup> system, in H<sub>2</sub>O/CH<sub>3</sub>OH (50/50 vol/vol).

**Figure S9.** Experimental (top) and calculated (bottom) HR-ESI-Mass Spectra for the [CuL1(Cl)]<sup>+</sup> system, in H<sub>2</sub>O/CH<sub>3</sub>OH (50/50 vol/vol).

**Figure S10.** Experimental (top) and calculated (bottom) HR-ESI-Mass Spectra for the [CuL2(Cl)]<sup>+</sup> system, in H<sub>2</sub>O/CH<sub>3</sub>OH (50/50 vol/vol).

**Figure S11.** Experimental (top) and calculated (bottom) HR-ESI-Mass Spectra for the [CuL3(Cl)]<sup>+</sup> system, in H<sub>2</sub>O/CH<sub>3</sub>OH (50/50 vol/vol).

**Figure S12.** Experimental (top) and calculated (bottom) HR-ESI-Mass Spectra for the [CuL1(ClO<sub>4</sub>)]<sup>+</sup> system, in H<sub>2</sub>O/CH<sub>3</sub>OH (50/50 vol/vol).

**Figure S13.** Experimental (top) and calculated (bottom) HR-ESI-Mass Spectra for the [CuL2(ClO<sub>4</sub>)]<sup>+</sup> system, in H<sub>2</sub>O/CH<sub>3</sub>OH (50/50 vol/vol).

**Figure S14.** Experimental (top) and calculated (bottom) HR-ESI-Mass Spectra for the  $[\text{CuL3}(\text{ClO}_4)]^+$  system, in  $\text{H}_2\text{O}/\text{CH}_3\text{OH}$  (50/50 vol/vol).

**Figure S15.** Experimental (top) and calculated (bottom) HR-ESI-Mass Spectra for the  $[\text{CuH}_1\text{L1}]^+$  system, in  $\text{H}_2\text{O}/\text{CH}_3\text{OH}$  (50/50 vol/vol).

**Figure S16.** Experimental (top) and calculated (bottom) HR-ESI-Mass Spectra for the  $[\text{CuH}_1\text{L3}]^+$  system, in  $\text{H}_2\text{O}/\text{CH}_3\text{OH}$  (50/50 vol/vol).

**Figure S17.** Experimental (top) and calculated (bottom) HR-ESI-Mass Spectra for the  $[\text{Cu}_2\text{H}_1\text{L2}(\text{Cl})]^{2+}$  system, in  $\text{H}_2\text{O}/\text{CH}_3\text{OH}$  (50/50 vol/vol).

**Figure S18.** Experimental (top) and calculated (bottom) HR-ESI-Mass Spectra for the  $[\text{Cu}_2\text{H}_1\text{L3}(\text{Cl})]^{2+}$  system, in  $\text{H}_2\text{O}/\text{CH}_3\text{OH}$  (50/50 vol/vol).

**Figure S19.** Experimental (top) and calculated (bottom) HR-ESI-Mass Spectra for the  $[\text{Cu}_2\text{H}_1\text{L2}(\text{ClO}_4)]^{2+}$  system, in  $\text{H}_2\text{O}/\text{CH}_3\text{OH}$  (50/50 vol/vol).

**Figure S20.** Experimental (top) and calculated (bottom) HR-ESI-Mass Spectra for the  $[\text{Cu}_2\text{H}_1\text{L3}(\text{ClO}_4)]^{2+}$  system, in  $\text{H}_2\text{O}/\text{CH}_3\text{OH}$  (50/50 vol/vol).

**Figure S21.** Experimental (top) and calculated (bottom) HR-ESI-Mass Spectra for the  $[\text{Cu}_2\text{H}_2\text{L1}]^{2+}$  system, in  $\text{H}_2\text{O}/\text{CH}_3\text{OH}$  (50/50 vol/vol).

**Figure S22.** Experimental (top) and calculated (bottom) HR-ESI-Mass Spectra for the  $[\text{Cu}_2\text{H}_2\text{L2}]^{2+}$  system, in  $\text{H}_2\text{O}/\text{CH}_3\text{OH}$  (50/50 vol/vol).

**Figure S23.** Experimental (top) and calculated (bottom) HR-ESI-Mass Spectra for the  $[\text{Cu}_2\text{H}_2\text{L3}]^{2+}$  system, in  $\text{H}_2\text{O}/\text{CH}_3\text{OH}$  (50/50 vol/vol).

**Figure S24.** Experimental (top) and calculated (bottom) HR-ESI-Mass Spectra for the  $[\text{Cu}_2\text{H}_2\text{L1}(\text{Cl})]^+$  system, in  $\text{H}_2\text{O}/\text{CH}_3\text{OH}$  (50/50 vol/vol).

**Figure S245.** Experimental (top) and calculated (bottom) HR-ESI-Mass Spectra for the  $[\text{Cu}_2\text{H}_2\text{L2}(\text{Cl})]^+$  system, in  $\text{H}_2\text{O}/\text{CH}_3\text{OH}$  (50/50 vol/vol).

**Figure S26.** Experimental (top) and calculated (bottom) HR-ESI-Mass Spectra for the  $[\text{Cu}_2\text{H}_2\text{L3}(\text{Cl})]^+$  system, in  $\text{H}_2\text{O}/\text{CH}_3\text{OH}$  (50/50 vol/vol).

**Figure S27.** Experimental (top) and calculated (bottom) HR-ESI-Mass Spectra for the  $[\text{Cu}_2\text{H}_2\text{L2}(\text{ClO}_4)]^+$  system, in  $\text{H}_2\text{O}/\text{CH}_3\text{OH}$  (50/50 vol/vol).

**Figure S28.** Experimental (top) and calculated (bottom) HR-ESI-Mass Spectra for the  $[\text{Cu}_2\text{H}_2\text{L3}(\text{ClO}_4)]^+$  system, in  $\text{H}_2\text{O}/\text{CH}_3\text{OH}$  (50/50 vol/vol).

**Figure S29.** Paramagnetic  $^1\text{H}$  NMR spectrum of the system  $\text{Cu}^{2+}\text{-L1}$  in a 2:1 molar ratio recorded in  $\text{D}_2\text{O}$  at  $\text{pH}=7$ .

**Figure S30.** Paramagnetic  $^1\text{H}$  NMR spectrum of the system  $\text{Cu}^{2+}\text{-L3}$  for 2:1 molar ratio in  $\text{D}_2\text{O}$  at 298 K at  $\text{pH}=6$ .

**Figure S31.** ESR spectrum for the system  $\text{Cu}^{2+}\text{-L1}$ .  $[\text{L}] 1 \cdot 10^{-3} \cdot \text{M}$ ;  $[\text{Cu}^{2+}] = 2 \cdot 10^{-3} \text{ M}$ .  $\text{H}_2\text{O}$ .  $\nu = 9.47 \text{ GHz}$ .  $T = 77 \text{ K}$ .  $\text{pH } 3, 6, 9 \text{ y } 11$ .

**Figure S32.** ESR spectrum for the system  $\text{Cu}^{2+}$ -**L1**.  $[\text{L}] = [\text{Cu}^{2+}] = 1 \cdot 10^{-3}$  M compared to  $[\text{L}] = 1 \cdot 10^{-3}$  M,  $[\text{Cu}] = 2 \cdot 10^{-3}$  at different pH.  $\text{H}_2\text{O}$ .  $\nu = 9.47$  GHz.  $T = 77$  K. pH 6, 9 y 11.

**Figure S33.** Cyclic voltammograms at the glassy carbon electrode of  $1.0 \times 10^{-3}$  M aqueous solutions for the mononuclear (a) **Cu-L2**, (b) **Cu-L3** and binuclear (b) **Cu<sub>2</sub>L2**, (b)**Cu-L3** systems, in 0.15 M NaCl at pH 7.0. Potential scan initiated at 0.25 V vs. Ag/AgCl in the negative direction. Scan rate 50 mV/s.

**Figure S34.**  $^1\text{H}$  NMR spectrum of **L1** in  $\text{D}_2\text{O}$ .

**Figure S35.**  $^{13}\text{C}$  NMR spectrum of **L1** in  $\text{D}_2\text{O}$ .

## II. Tables

**Table S1.** Chemical shift values, linewidths at half-height, transversal relaxation time values ( $T_2$ ) and assignments.

**Table S2.** The hyperfine-shifted resonances, linewidth and half-height and  $T_2$  values.

**Table S3.** Crystallographic data of crystal structures of complex **1** and **2**.

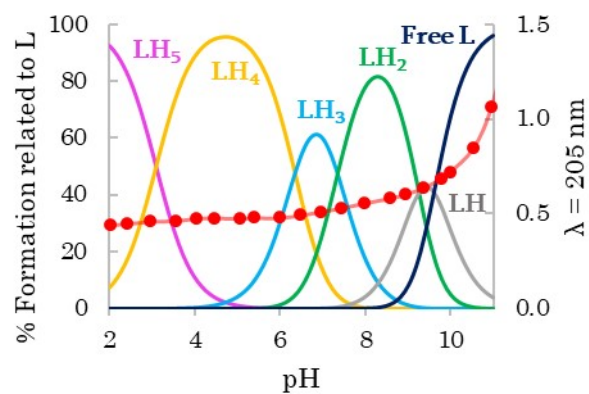

**Figure S1.** Distribution diagrams of the protonated species formed by **L1** overlapped with the absorbance at 205 nm

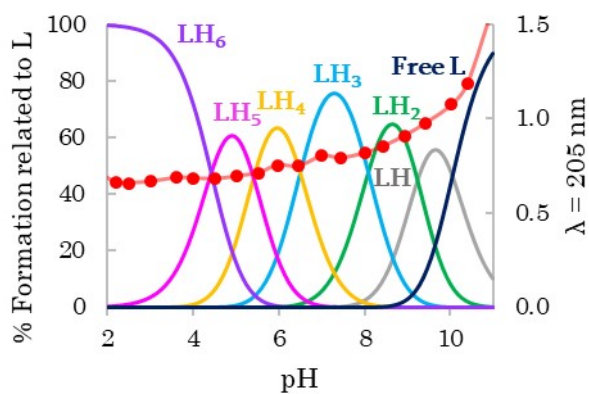

**Figure S2.** Distribution diagrams of the protonated species formed by **L2** overlapped with the absorbance at 205 nm

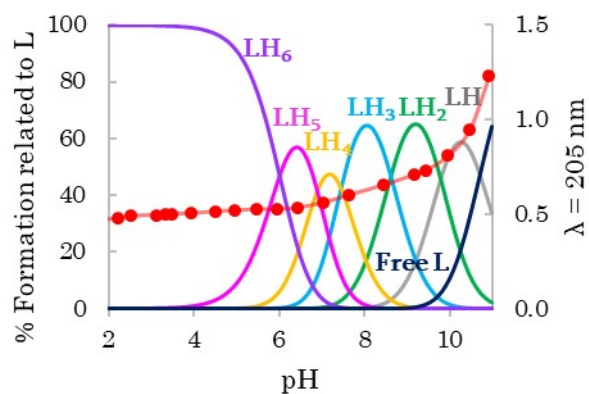

**Figure S3.** Distribution diagrams of the protonated species formed by **L3** overlapped with the absorbance at 205 nm

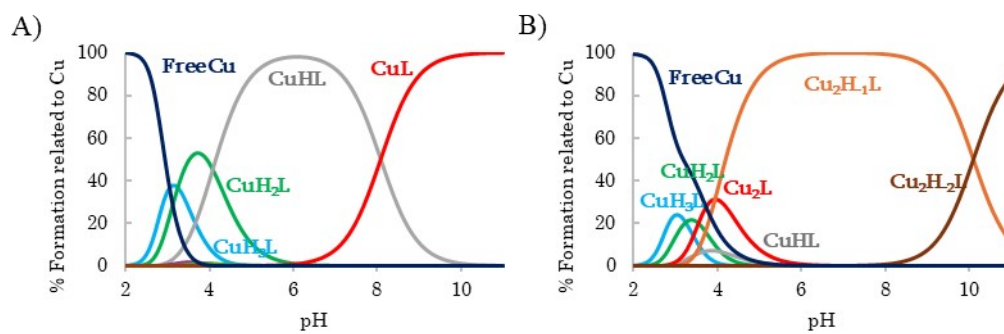

**Figure S4.** Distribution diagram for the system  $\text{Cu}^{2+}$ - **L2** molar ratio M:L 1:1 and 2:1

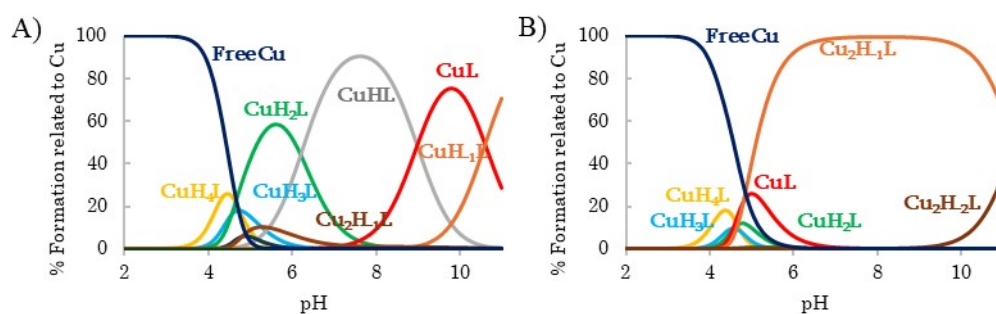

**Figure S5.** Distribution diagram for the system  $\text{Cu}^{2+}$ - **L3** molar ratio M:L 1:1 and 2:1

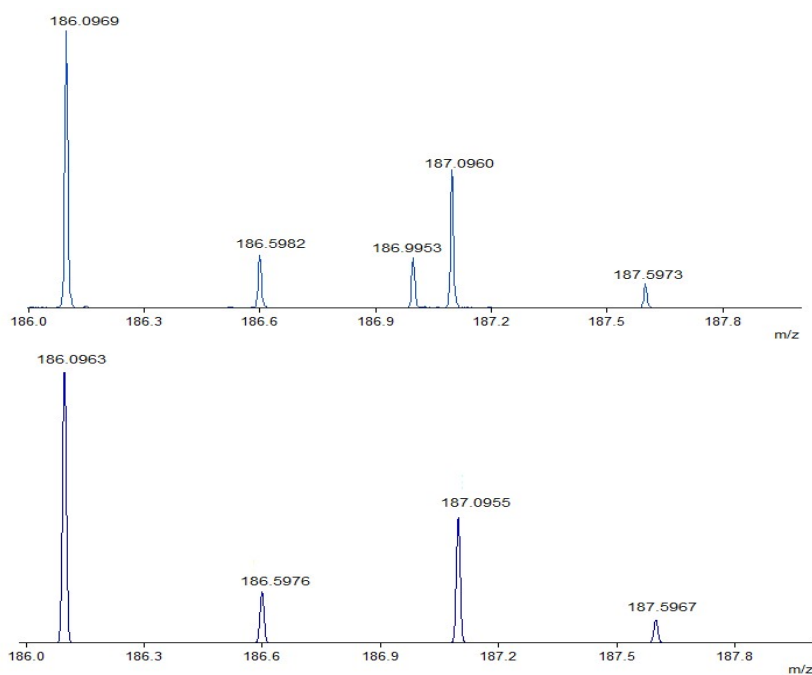

**Figure S6.** Experimental (top) and calculated (bottom) HR-ESI-Mass Spectra for the  $[\text{CuL1}]^{2+}$  system, in  $\text{H}_2\text{O}/\text{CH}_3\text{OH}$  (50/50 vol/vol).

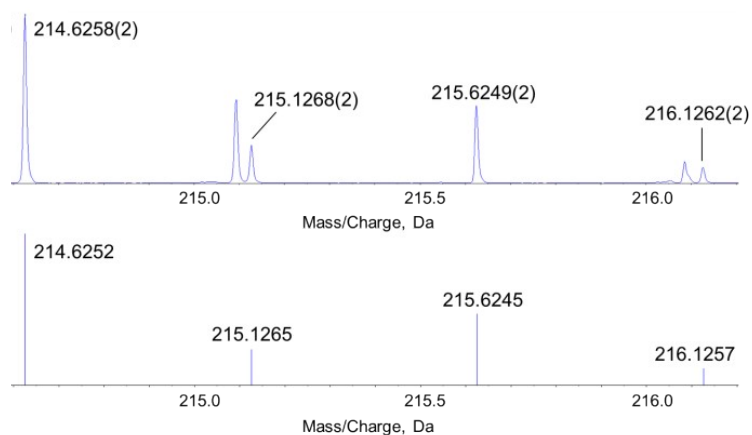

**Figure S7.** Experimental (top) and calculated (bottom) HR-ESI-Mass Spectra for the  $[\text{CuL2}]^{2+}$  system, in  $\text{H}_2\text{O}/\text{CH}_3\text{OH}$  (50/50 vol/vol).

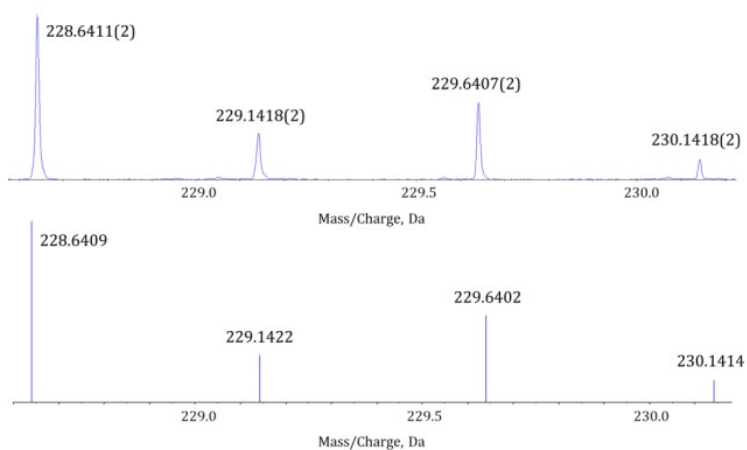

**Figure S8.** Experimental (top) and calculated (bottom) HR-ESI-Mass Spectra for the  $[\text{CuL3}]^{2+}$  system, in  $\text{H}_2\text{O}/\text{CH}_3\text{OH}$  (50/50 vol/vol).

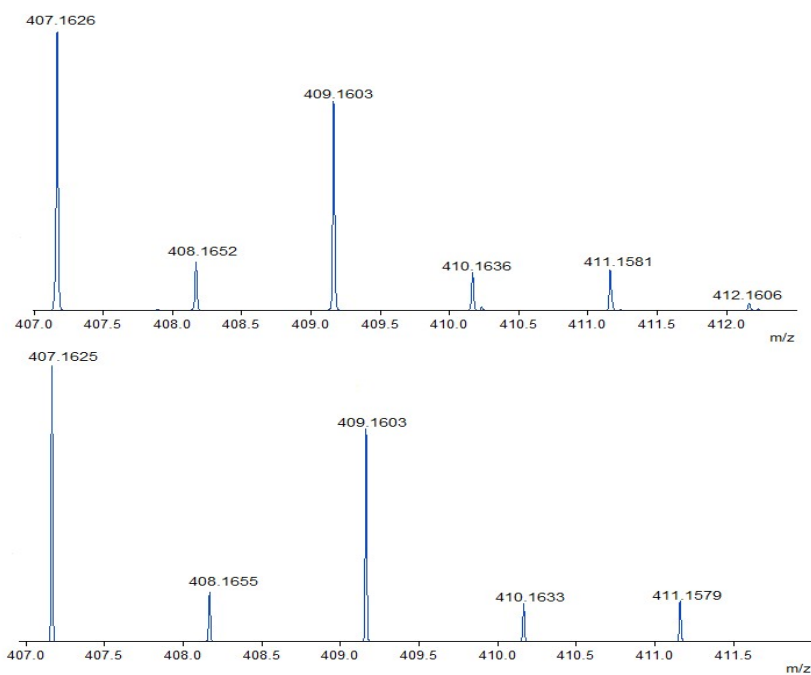

**Figure S9.** Experimental (top) and calculated (bottom) HR-ESI-Mass Spectra for the  $[\text{CuL1}(\text{Cl})]^+$  system, in  $\text{H}_2\text{O}/\text{CH}_3\text{OH}$  (50/50 vol/vol).

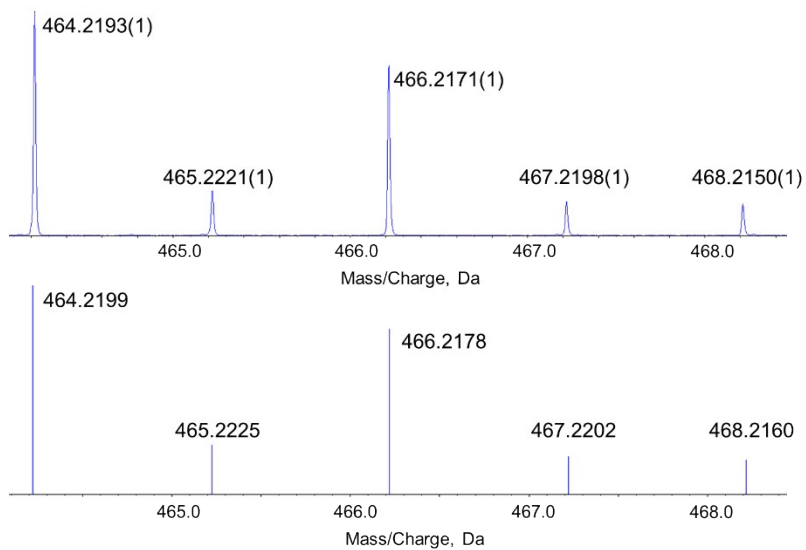

**Figure S10.** Experimental (top) and calculated (bottom) HR-ESI-Mass Spectra for the  $[\text{CuL2}(\text{Cl})]^+$  system, in  $\text{H}_2\text{O}/\text{CH}_3\text{OH}$  (50/50 vol/vol).

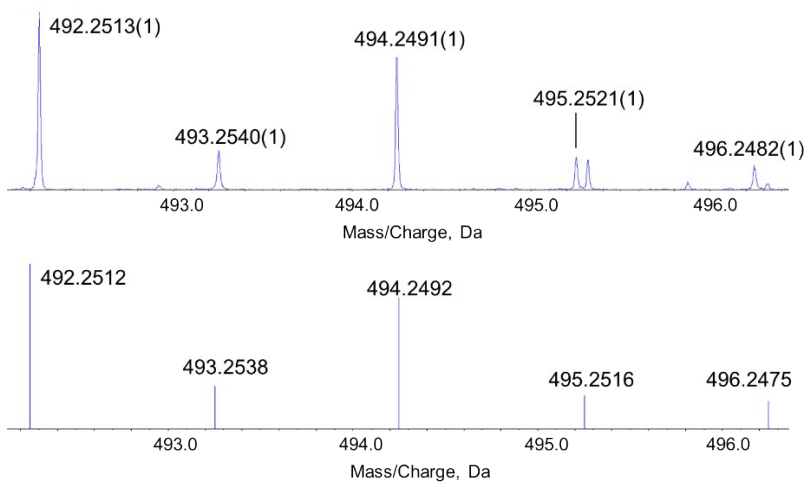

**Figure S11.** Experimental (top) and calculated (bottom) HR-ESI-Mass Spectra for the  $[\text{CuL3}(\text{Cl})]^+$  system, in  $\text{H}_2\text{O}/\text{CH}_3\text{OH}$  (50/50 vol/vol)

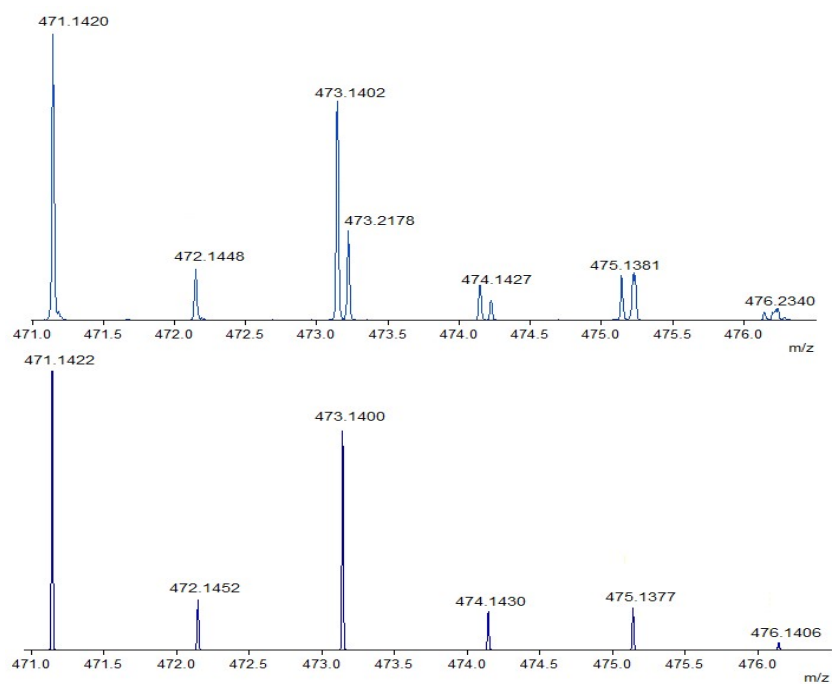

**Figure S12.** Experimental (top) and calculated (bottom) HR-ESI-Mass Spectra for the  $[\text{CuL1}(\text{ClO}_4)]^+$  system, in  $\text{H}_2\text{O}/\text{CH}_3\text{OH}$  (50/50 vol/vol).

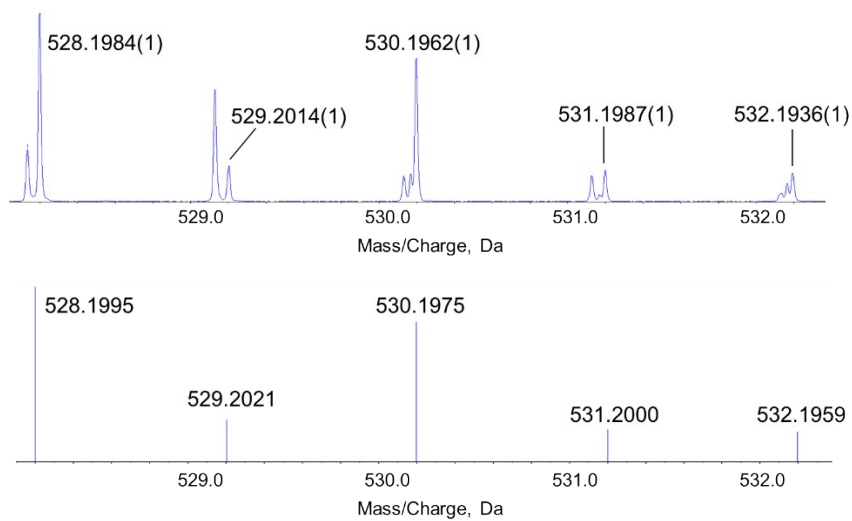

**Figure S13.** Experimental (top) and calculated (bottom) HR-ESI-Mass Spectra for the  $[\text{CuL2}(\text{ClO}_4)]^+$  system, in  $\text{H}_2\text{O}/\text{CH}_3\text{OH}$  (50/50 vol/vol).



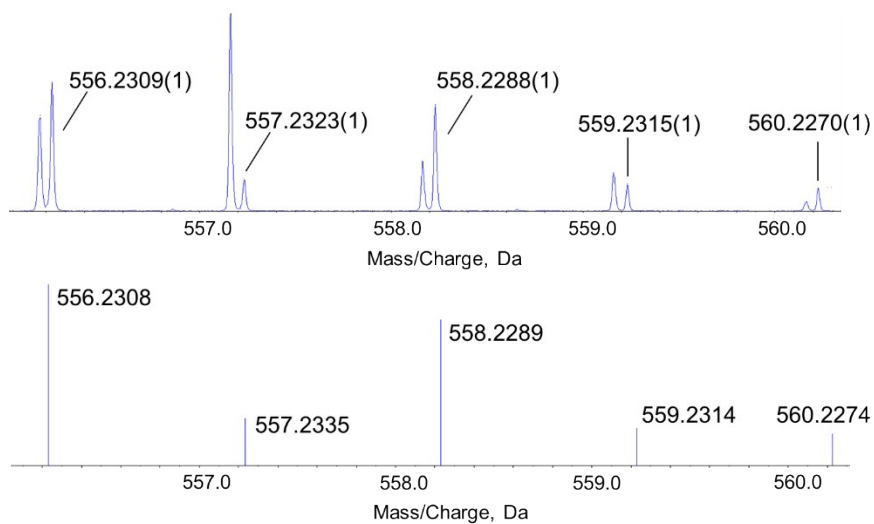

**Figure S14.** Experimental (top) and calculated (bottom) HR-ESI-Mass Spectra for the  $[\text{CuL}_3(\text{ClO}_4)]^+$  system, in  $\text{H}_2\text{O}/\text{CH}_3\text{OH}$  (50/50 vol/vol).

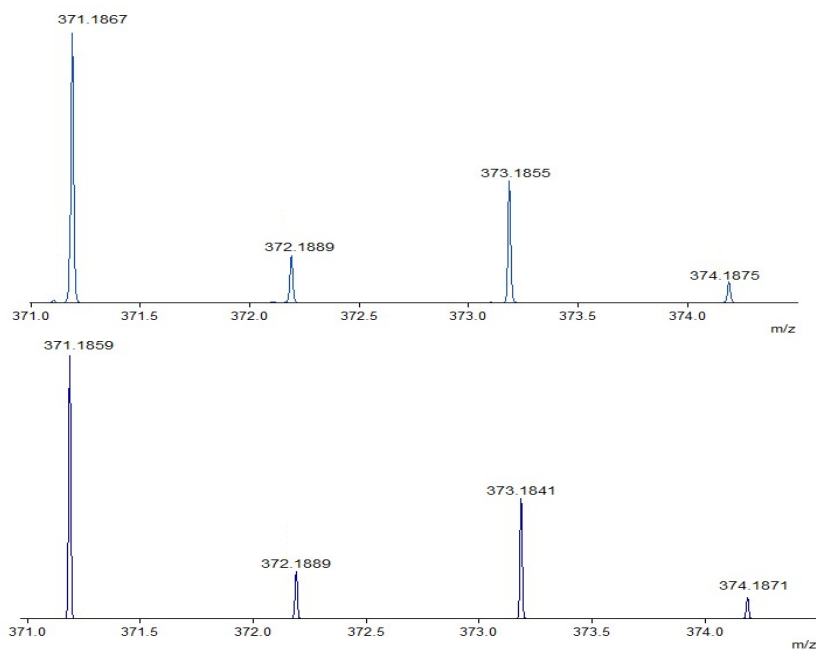

**Figure S15.** Experimental (top) and calculated (bottom) HR-ESI-Mass Spectra for the  $[\text{CuH}_1\text{L}_1]^+$  system, in  $\text{H}_2\text{O}/\text{CH}_3\text{OH}$  (50/50 vol/vol).

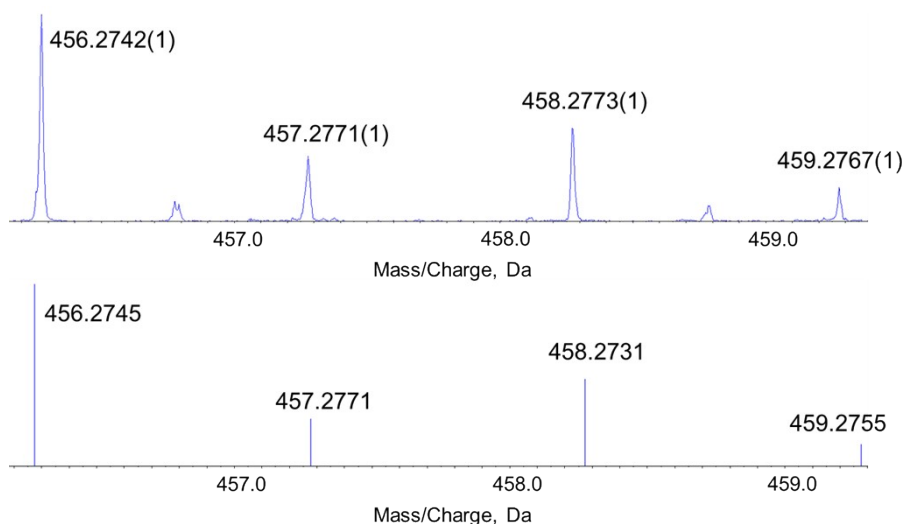

**Figure S16.** Experimental (top) and calculated (bottom) HR-ESI-Mass Spectra for the  $[\text{CuH}_1\text{L}_3]^+$  system, in  $\text{H}_2\text{O}/\text{CH}_3\text{OH}$  (50/50 vol/vol).

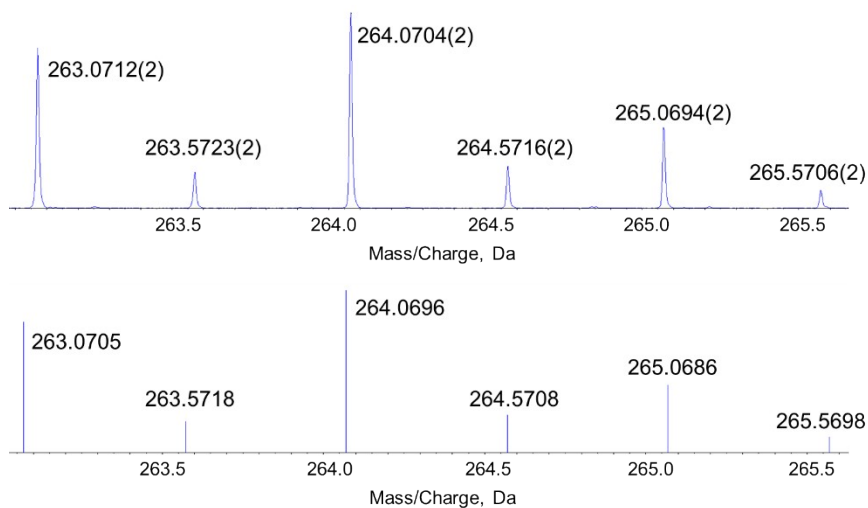

**Figure S17.** Experimental (top) and calculated (bottom) HR-ESI-Mass Spectra for the  $[\text{Cu}_2\text{H}_1\text{L}_2(\text{Cl})]^{2+}$  system, in  $\text{H}_2\text{O}/\text{CH}_3\text{OH}$  (50/50 vol/vol).

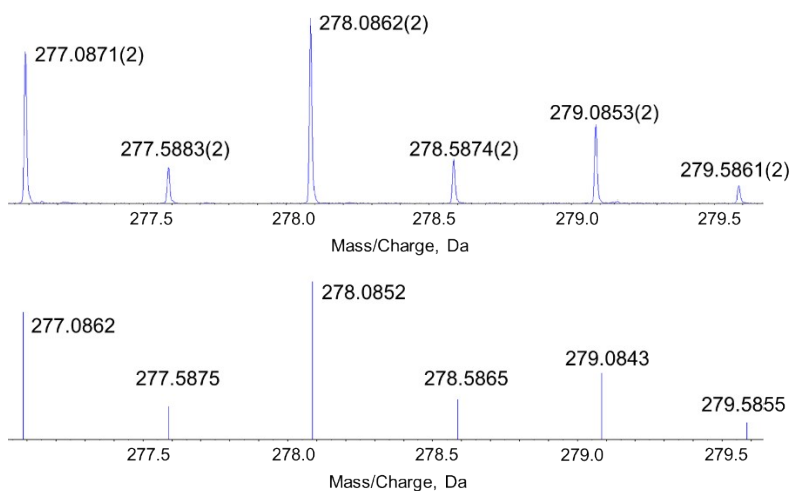

**Figure S18.** Experimental (top) and calculated (bottom) HR-ESI-Mass Spectra for the  $[\text{Cu}_2\text{H}_1\text{L}_2]^{2+}$  system, in  $\text{H}_2\text{O}/\text{CH}_3\text{OH}$  (50/50 vol/vol).

${}^1\text{L3}(\text{Cl})]^{2+}$  system, in  $\text{H}_2\text{O}/\text{CH}_3\text{OH}$  (50/50 vol/vol).

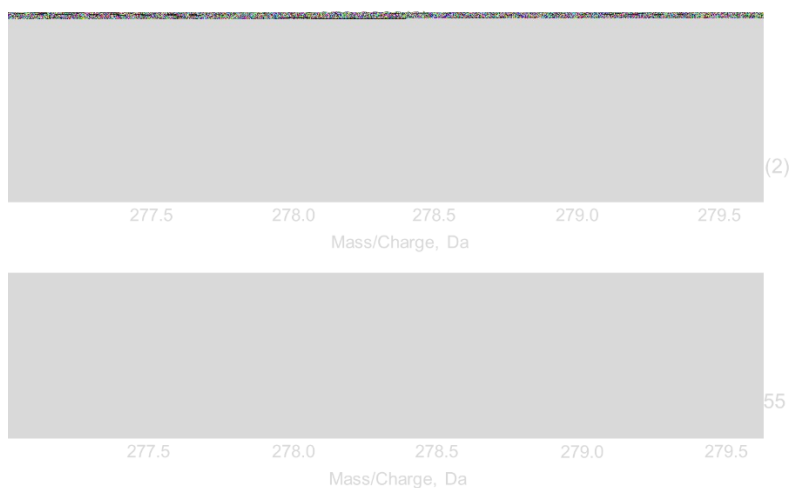

**Figure S19.** Experimental (top) and calculated (bottom) HR-ESI-Mass Spectra for the  $[\text{Cu}_2\text{H.}{}^1\text{L2}(\text{ClO}_4)]^{2+}$  system, in  $\text{H}_2\text{O}/\text{CH}_3\text{OH}$  (50/50 vol/vol).

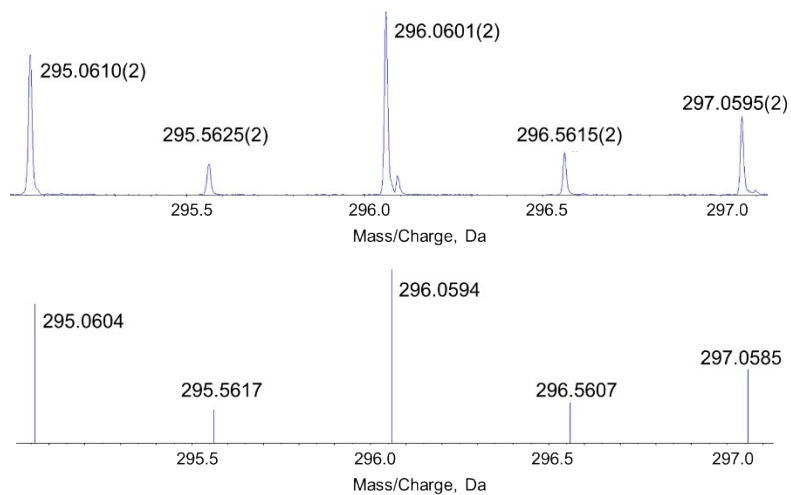

**Figure S20.** Experimental (top) and calculated (bottom) HR-ESI-Mass Spectra for the  $[\text{Cu}_2\text{H.}{}^1\text{L3}(\text{ClO}_4)]^{2+}$  system, in  $\text{H}_2\text{O}/\text{CH}_3\text{OH}$  (50/50 vol/vol).

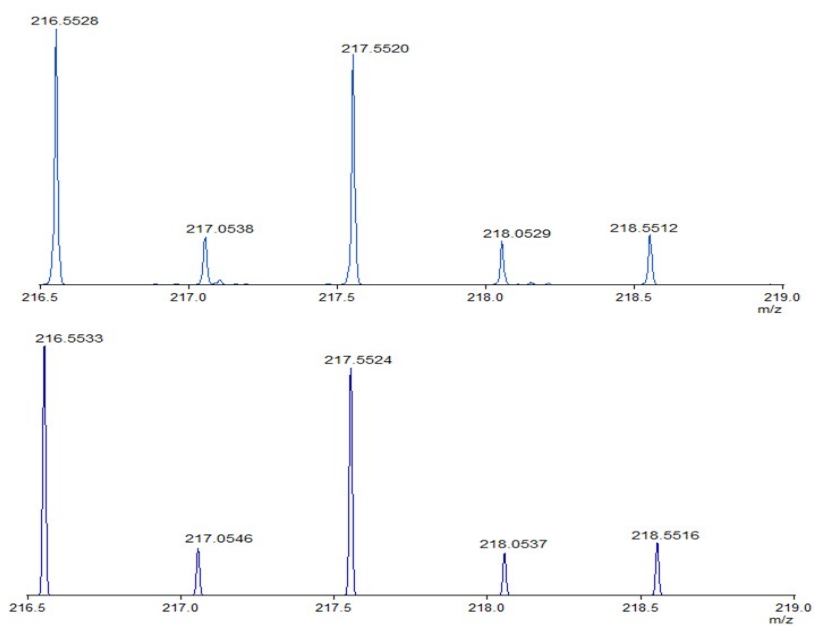

**Figure S21.** Experimental (top) and calculated (bottom) HR-ESI-Mass Spectra for the  $[\text{Cu}_2\text{H}_2\text{L1}]^{2+}$  system, in  $\text{H}_2\text{O}/\text{CH}_3\text{OH}$  (50/50 vol/vol).

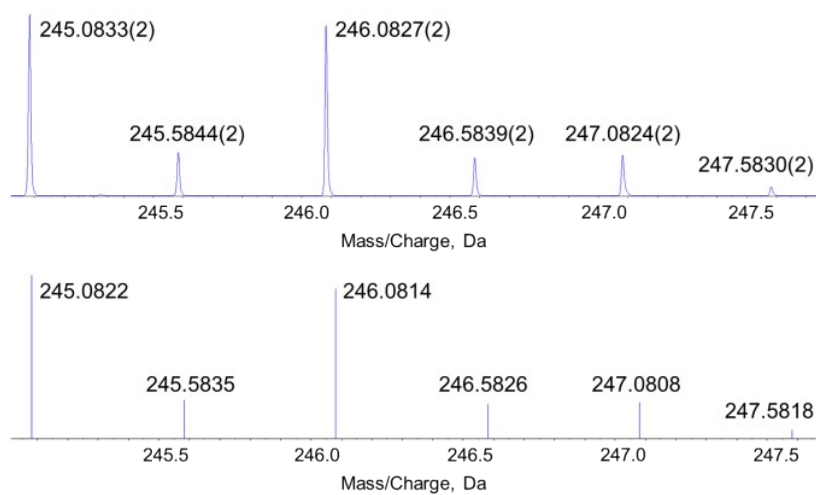

**Figure S22.** Experimental (top) and calculated (bottom) HR-ESI-Mass Spectra for the  $[\text{Cu}_2\text{H}_2\text{L2}]^{2+}$  system, in  $\text{H}_2\text{O}/\text{CH}_3\text{OH}$  (50/50 vol/vol).

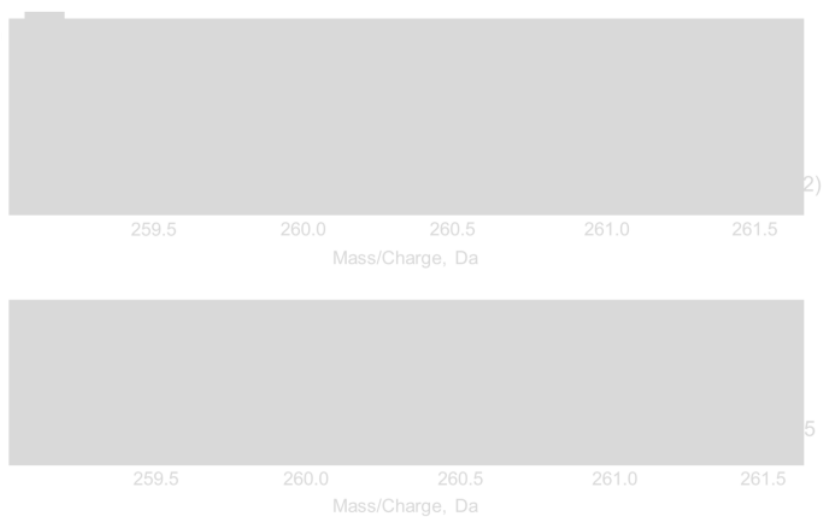

**Figure S23.** Experimental (top) and calculated (bottom) HR-ESI-Mass Spectra for the  $[\text{Cu}_2\text{H}_2\text{L}_3]^{2+}$  system, in  $\text{H}_2\text{O}/\text{CH}_3\text{OH}$  (50/50 vol/vol).

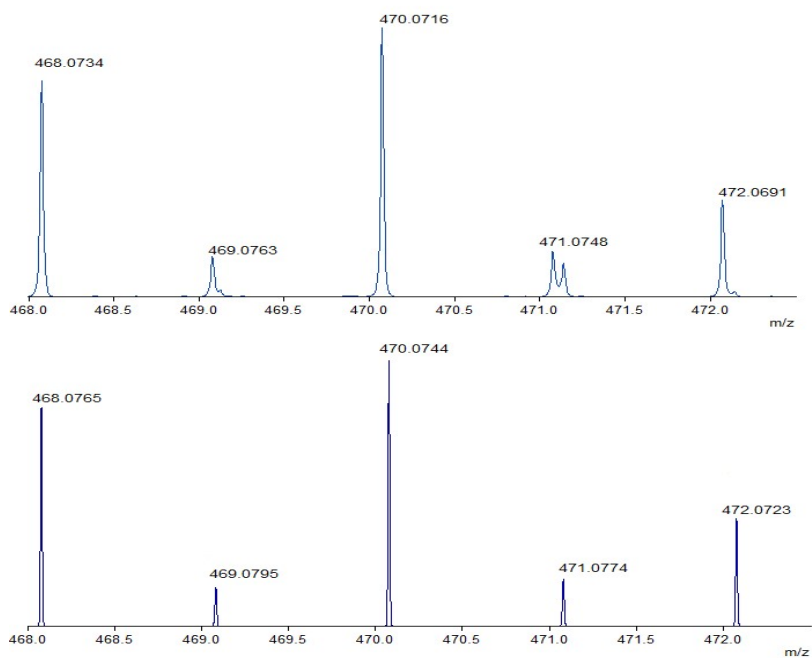

**Figure S24.** Experimental (top) and calculated (bottom) HR-ESI-Mass Spectra for the  $[\text{Cu}_2\text{H}_2\text{L}_1(\text{Cl})]^+$  system, in  $\text{H}_2\text{O}/\text{CH}_3\text{OH}$  (50/50 vol/vol).

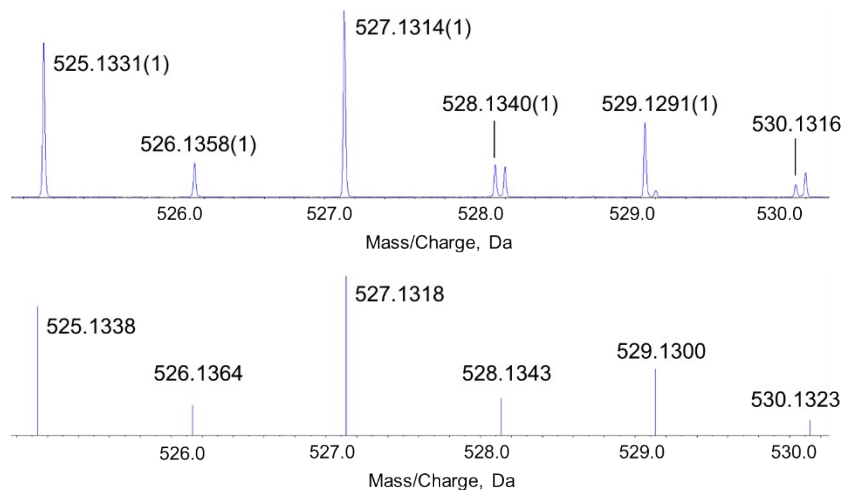

**Figure S245.** Experimental (top) and calculated (bottom) HR-ESI-Mass Spectra for the  $[\text{Cu}_2\text{H}_2\text{L}_2(\text{Cl})]^+$  system, in  $\text{H}_2\text{O}/\text{CH}_3\text{OH}$  (50/50 vol/vol).

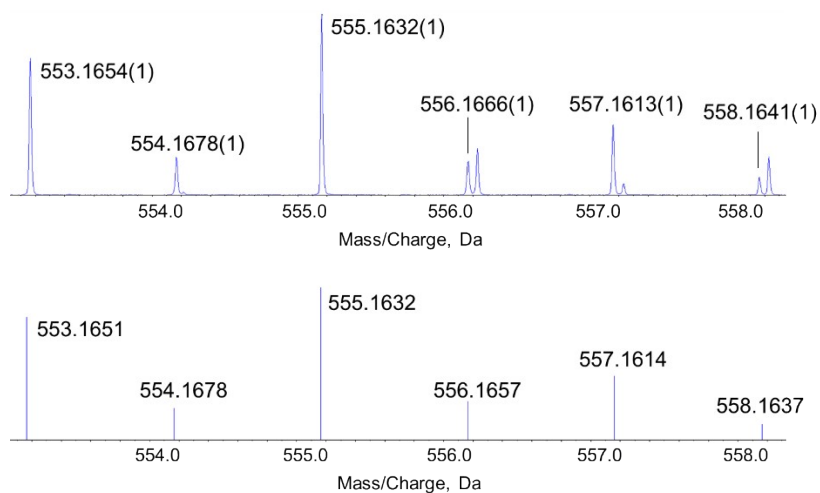

**Figure S26.** Experimental (top) and calculated (bottom) HR-ESI-Mass Spectra for the  $[\text{Cu}_2\text{H}_2\text{L}_3(\text{Cl})]^+$  system, in  $\text{H}_2\text{O}/\text{CH}_3\text{OH}$  (50/50 vol/vol).

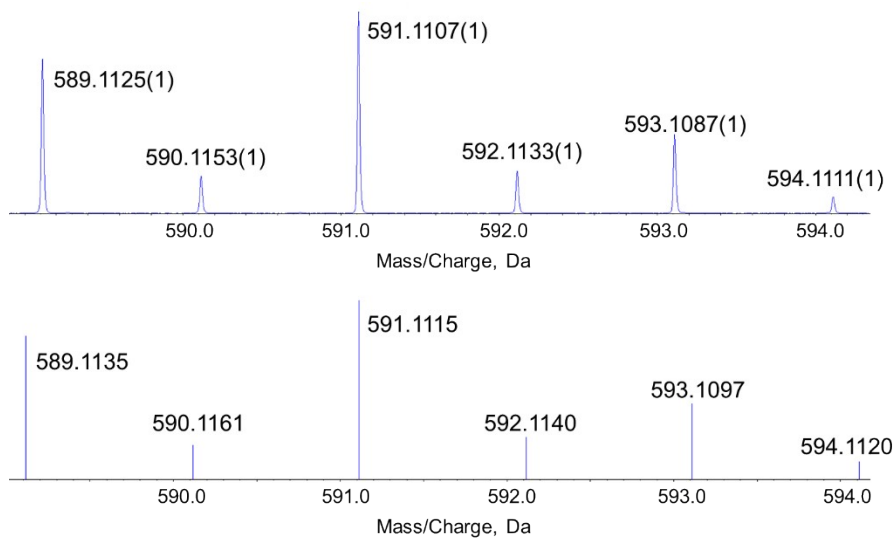

**Figure S27.** Experimental (top) and calculated (bottom) HR-ESI-Mass Spectra for the  $[\text{Cu}_2\text{H}_2\text{L}_4(\text{Cl})]^+$  system, in  $\text{H}_2\text{O}/\text{CH}_3\text{OH}$  (50/50 vol/vol).

${}_{2}\text{L2}(\text{ClO}_4)^+$  system, in  $\text{H}_2\text{O}/\text{CH}_3\text{OH}$  (50/50 vol/vol).

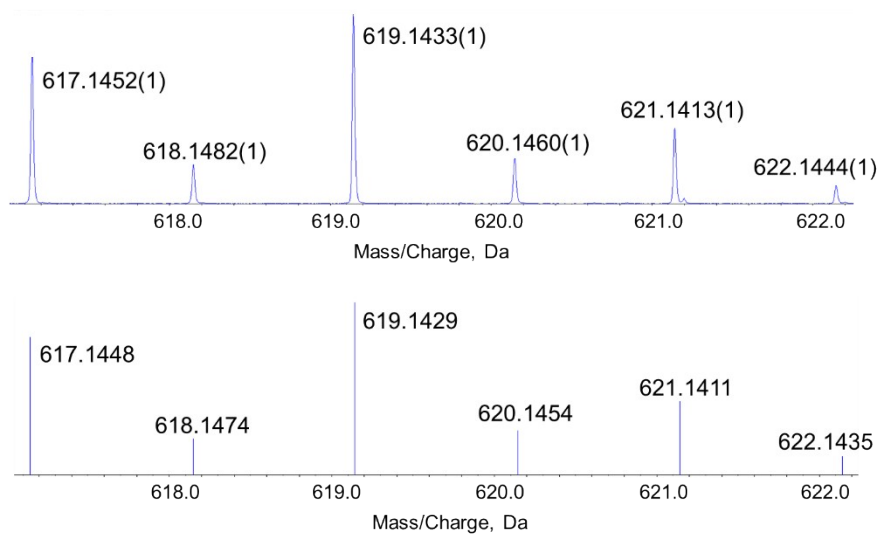

**Figure S28.** Experimental (top) and calculated (bottom) HR-ESI-Mass Spectra for the  $[\text{Cu}_2\text{H}_2\text{L3}(\text{ClO}_4)]^+$  system, in  $\text{H}_2\text{O}/\text{CH}_3\text{OH}$  (50/50 vol/vol).

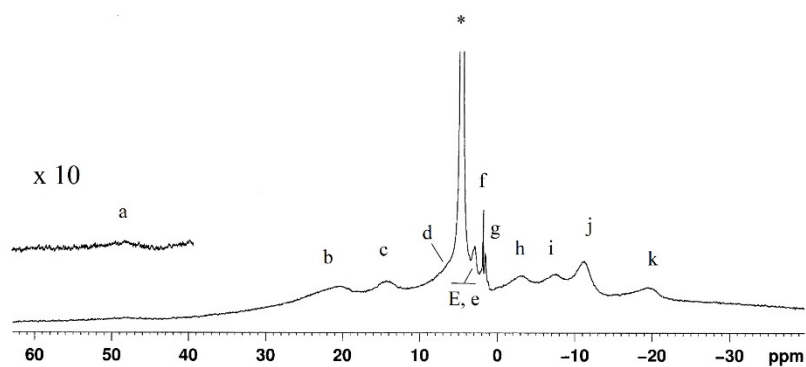

**Figure S29.** Paramagnetic  ${}^1\text{H}$  NMR spectrum of the system  $\text{Cu}^{2+}$ -L1 in a 2:1 molar ratio recorded in  $\text{D}_2\text{O}$  at pH=7

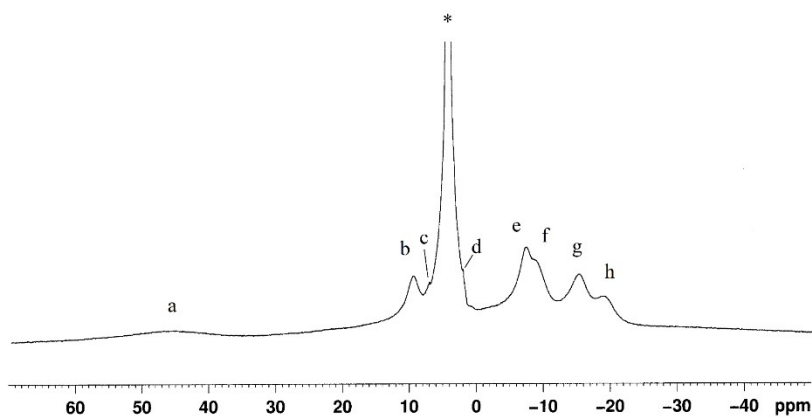

**Figure S30.** Paramagnetic  ${}^1\text{H}$  NMR spectrum of the system  $\text{Cu}^{2+}$ -L3 for 2:1 molar ratio in  $\text{D}_2\text{O}$  at 298 K at pH=6

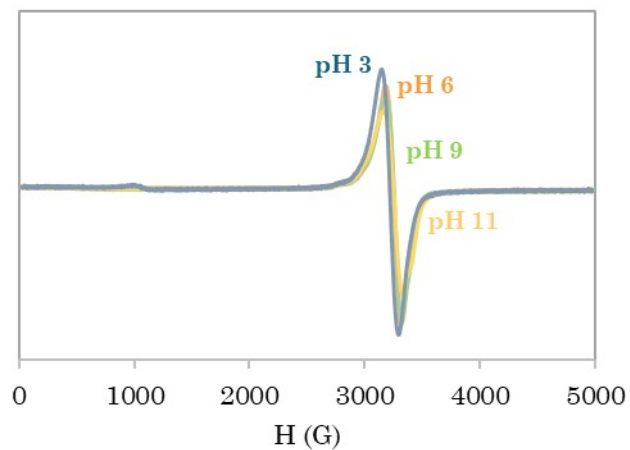

**Figure S31.** ESR spectrum for the system  $\text{Cu}^{2+}\text{-L1}$ .  $[\text{L}] = 1 \cdot 10^{-3} \text{ M}$ ;  $[\text{Cu}^{2+}] = 2 \cdot 10^{-3} \text{ M}$ .  $\text{H}_2\text{O}$ .  $\nu = 9.47 \text{ GHz}$ .  $T = 77 \text{ K}$ . pH 3, 6, 9 y 11

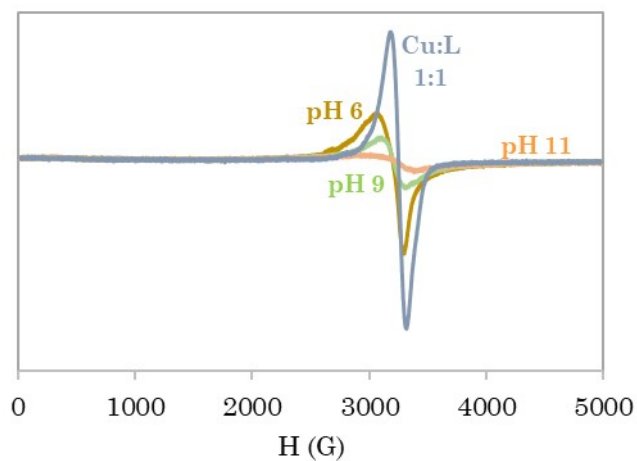

**Figure S32.** ESR spectrum for the system  $\text{Cu}^{2+}\text{-L1}$ .  $[\text{L}] = [\text{Cu}^{2+}] = 1 \cdot 10^{-3} \text{ M}$  compared to  $[\text{L}] = 1 \cdot 10^{-3} \text{ M}$ ,  $[\text{Cu}] = 2 \cdot 10^{-3}$  at different pH.  $\text{H}_2\text{O}$ .  $\nu = 9.47 \text{ GHz}$ .  $T = 77 \text{ K}$ . pH 6, 9 y 11.



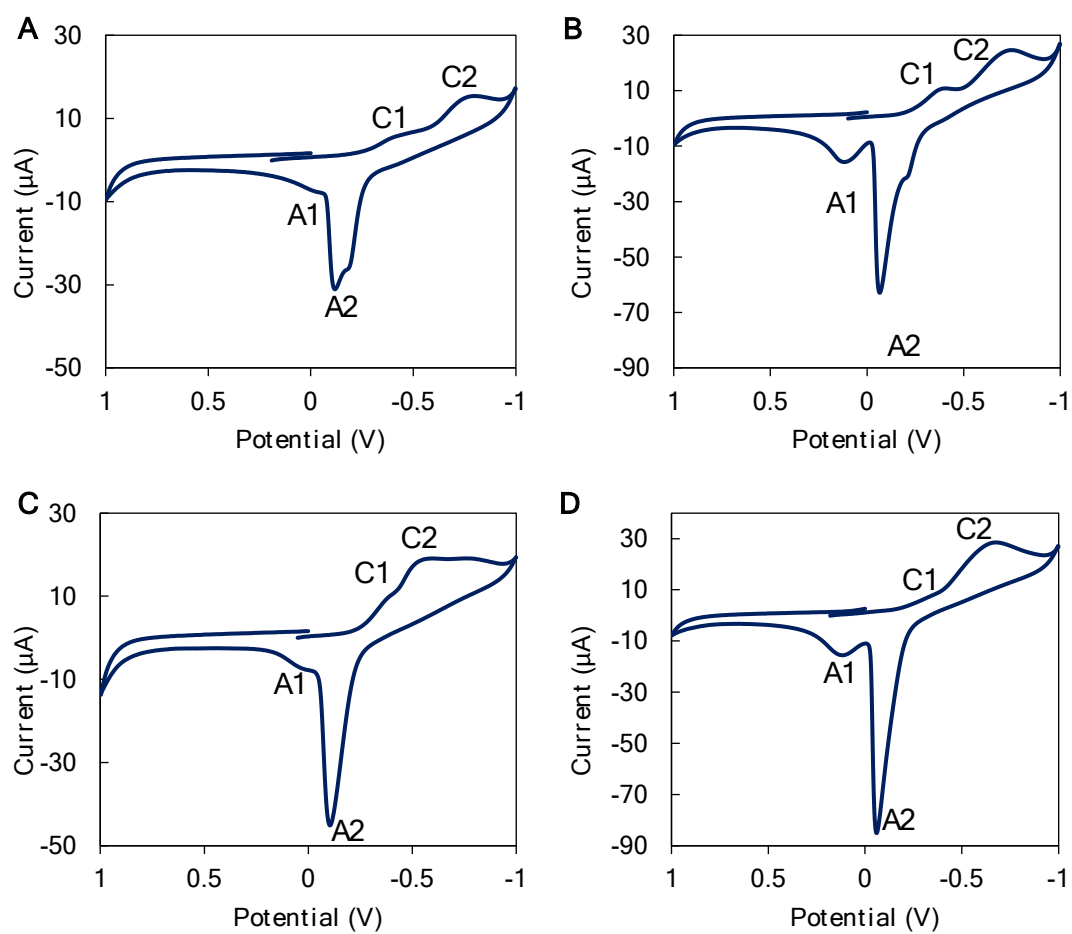

**Figure S33.** Cyclic voltammograms at the glassy carbon electrode of  $1.0 \times 10^{-3}$  M aqueous solutions for the mononuclear (a) Cu-L2, (b) Cu-L3 and binuclear (b) Cu<sub>2</sub>L2, (b)Cu-L3 systems, in 0.15 M NaCl at pH 7.0. Potential scan initiated at 0.25 V vs. Ag/AgCl in the negative direction. Scan rate 50 mV/s

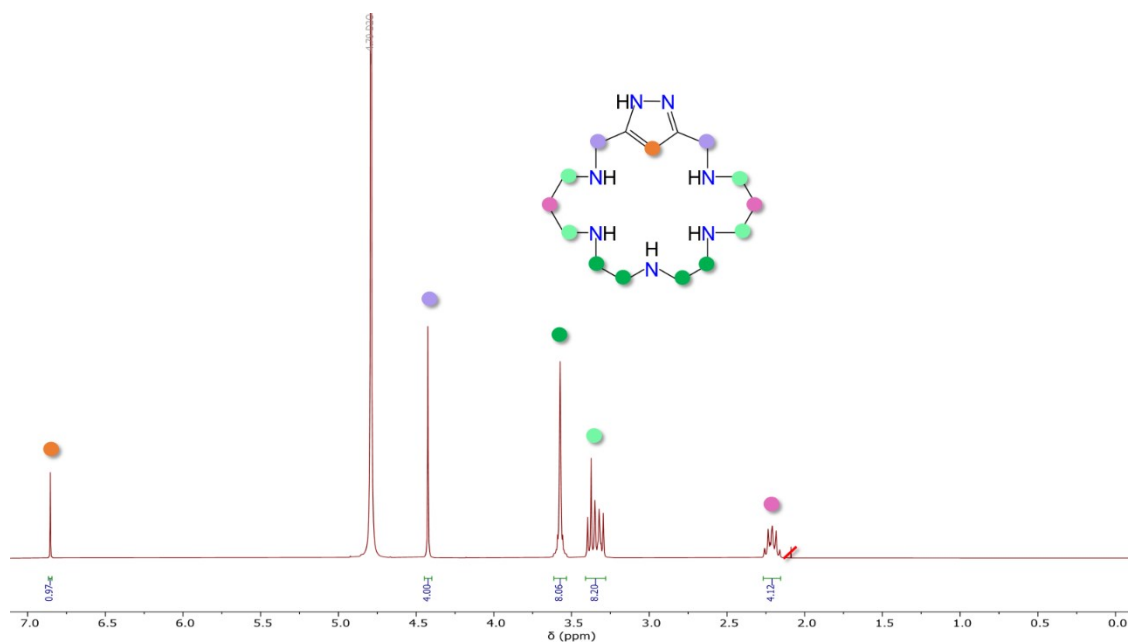

**Figure S34.**  $^1\text{H}$  NMR spectrum of  $\text{L1} \cdot 6\text{HBr}$  in  $\text{D}_2\text{O}$ .

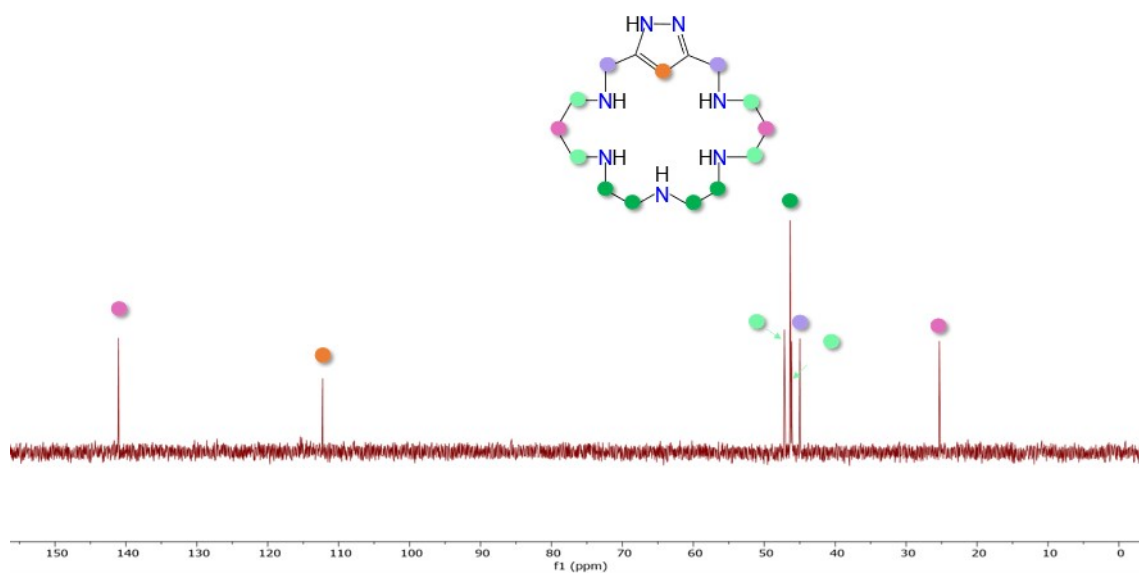

**Figure S35.**  $^{13}\text{C}$  NMR spectrum of  $\text{L1} \cdot 6\text{HBr}$  in  $\text{D}_2\text{O}$ .

## II. Tables

**Table S1.**  $^1\text{H}$  NMR hyperfine-shifted resonances of  $\text{Cu}_2\text{-(L1)}$  complex in  $\text{D}_2\text{O}$  at 298 K and pH 7.

| System                   | Signal         | $\delta$ (ppm) | N° of protons | Assignments                              | Temperature Dependence | $\Delta\nu_{1/2}$ (Hz) | $T_2^a$ (ms) |
|--------------------------|----------------|----------------|---------------|------------------------------------------|------------------------|------------------------|--------------|
| $\text{Cu}_2\text{(L1)}$ | a              | 48.0           |               |                                          | Curie                  | 2960                   | 0.11         |
|                          | b              | 20.6           |               |                                          | Curie                  | 1700                   | 0.19         |
|                          | c              | 14.4           |               |                                          | Indep. of T            | 1178                   | 0.27         |
|                          | d              | 6.1            | 20            | $\alpha\text{CH}_2$                      | Curie                  | b                      | b            |
|                          | h              | -3.1           |               |                                          | Curie                  | 1006                   | 0.32         |
|                          | i              | -7.4           |               |                                          | Curie                  | 850                    | 0.37         |
|                          | j              | -11.2          |               |                                          | Curie                  | 1121                   | 0.28         |
|                          | k              | -19.7          |               |                                          | Curie                  | 1811                   | 0.18         |
|                          | e              | 2.9            |               |                                          | anti-Curie             | b                      | b            |
|                          | E <sup>c</sup> | 3.0            |               |                                          | Indep. of T            | b                      | b            |
|                          | f              | 1.9            | anti-Curie    | 65                                       | 4.9                    |                        |              |
|                          | g              | 1.6            | 5             | $\beta\text{CH}_2$<br>H <sub>m</sub> -Pz | anti-Curie             | 86                     | 3.7          |

<sup>a</sup>Measured from the line width at half-height. <sup>b</sup>Overlap prevents measurement of this value.

<sup>c</sup>Measured at 313 K.

**Table S2.**  $^1\text{H}$  NMR hyperfine-shifted resonances of  $\text{Cu}_2\text{-(L3)}$  complex in  $\text{D}_2\text{O}$  at 298 K and pH 6.

| System                   | Signal | $\delta$ (ppm) | N° of protons                            | Assignments         | Temperature Dependence | $\Delta\nu_{1/2}$ (Hz) | $T_2^a$ (ms) |
|--------------------------|--------|----------------|------------------------------------------|---------------------|------------------------|------------------------|--------------|
| $\text{Cu}_2\text{(L3)}$ | a      | 46.5           | 24                                       | $\alpha\text{CH}_2$ | Curie                  | 4140                   | 0.08         |
|                          | b      | 9.8            |                                          |                     | Curie                  | 1060                   | 0.30         |
|                          | e      | -7.0           |                                          |                     | Curie                  | b                      | b            |
|                          | f      | -8.5           |                                          |                     | Curie                  | b                      | b            |
|                          | g      | -14.9          |                                          |                     | Curie                  | 1044                   | 0.31         |
|                          | h      | -18.6          |                                          |                     | Curie                  | b                      | b            |
|                          | c      | 7.3            |                                          |                     | b                      | b                      | b            |
|                          | d      | 2.5            |                                          |                     | b                      | b                      | b            |
|                          |        | 11             | $\beta\text{CH}_2, \text{H}_m\text{-Pz}$ |                     |                        |                        |              |

<sup>a</sup>Measured from the line width at half-height. <sup>b</sup>Overlap prevents measurement of this value.

**Table S3.** Crystallographic data of crystal structures of complex **1** and **2**.

| Structure                           | <b>1</b>                                                              | <b>2</b>                                                             |
|-------------------------------------|-----------------------------------------------------------------------|----------------------------------------------------------------------|
| Composition                         | $C_{15}H_{33.75}Br_{2.87}Cl_{0.13}CuN_7O_1$                           | $C_{20}H_{45}Cl_3Cu_2N_8O_{10}$                                      |
| Formula weight / $g \cdot mol^{-1}$ | 631.94 <sup>38</sup>                                                  | 791.07                                                               |
| Size / mm                           | 0.202×0.126×0.075                                                     | 0.253×0.172×0.146                                                    |
| Space group                         | P bca                                                                 | P <sub>-1</sub>                                                      |
| Unit cell                           |                                                                       |                                                                      |
| • $a / \text{Å}$                    | 14.263(4)                                                             | 11.925(3)                                                            |
| • $b / \text{Å}$                    | 14.560(4)                                                             | 11.935(3)                                                            |
| • $c / \text{Å}$                    | 21.837(6)                                                             | 13.621(4)                                                            |
| • $\alpha / \text{degrees}$         | 90                                                                    | 66.818(7)                                                            |
| • $\beta / \text{degrees}$          | 90                                                                    | 69.337(8)                                                            |
| • $\gamma / \text{degrees}$         | 90                                                                    | 65.348(12)                                                           |
| • $V / \text{Å}^3$                  | 4535(2)                                                               | 1577.8(7)                                                            |
| Density / $g \cdot cm^{-3}$         | 1.851                                                                 | 1.67                                                                 |
| Z                                   | 8                                                                     | 2                                                                    |
| $\mu / mm^{-1}$                     | 6.063                                                                 | 1.67                                                                 |
| F000                                | 2524                                                                  | 820                                                                  |
| Diffraction Limits                  | $-23 \leq h \leq 23$<br>$-24 \leq k \leq 24$<br>$-36 \leq l \leq -28$ | $-14 \leq h \leq 14$<br>$-14 \leq k \leq 14$<br>$-16 \leq l \leq 16$ |
| R(int)                              | 0.1048                                                                | 0.0956                                                               |
| R(sigma)                            | 0.0668                                                                | 0.0623                                                               |
| Reflections                         |                                                                       |                                                                      |
| • Total                             | 110405                                                                | 40075                                                                |
| • Unique                            | 10964                                                                 | 5547                                                                 |
| Parameters                          | 321                                                                   | 421                                                                  |
| Constraints                         | 0                                                                     | 0                                                                    |
| Restraints                          | 24                                                                    | 14                                                                   |
| R1                                  |                                                                       |                                                                      |
| • total                             | 0.1100                                                                | 0.1743                                                               |
| • $F^2 > 2\sigma(F^2)$              | 0.0459                                                                | 0.1161                                                               |
| wR2                                 |                                                                       |                                                                      |
| • total                             | 0.0994                                                                | 0.2925                                                               |
| • $F^2 > 2\sigma(F^2)$              | 0.0773                                                                | 0.2461                                                               |
| Goodnes of Fit                      | 1.065                                                                 | 1.050                                                                |
| CCDC deposition                     | 2240668                                                               | 2215780                                                              |
